# Supplementary material for: Echocardiography protocol for early detection of cardiac dysfunction in childhood cancer survivors in the multicenter DCCSS LATER 2 CARD study: Design, feasibility, and reproducibility
Source: PubMed Central journal article supplement (PMC8251836; doi:10.1111/echo.15081), 2021-05-20
Supplement: ECHO-38-951-s001.pdf [file ECHO-38-951-s001.pdf]

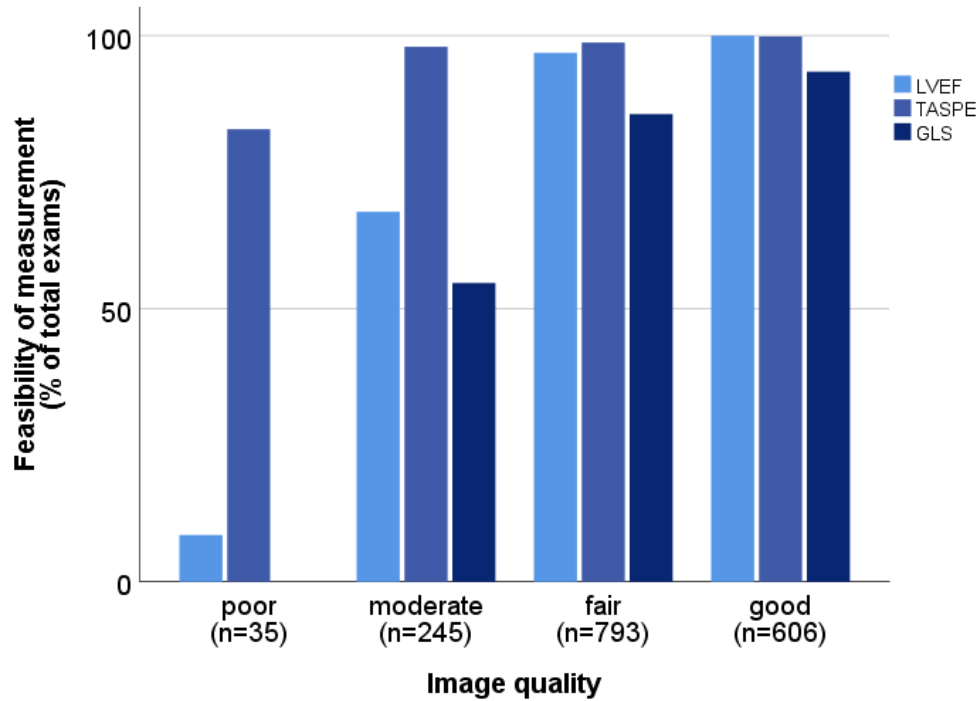

SUPPLEMENTAL FIGURE 1. Feasibility of measurements depicted for different image qualities.

Examples of a B-mode (LVEF = left ventricular ejection fraction), an M-mode (TAPSE = tricuspid annular systolic plane excursion) and a speckle tracking (GLS = global longitudinal strain) measurement are shown.
